# Supplementary figures and images for: Photochemical on-demand production of hydrogen peroxide in a modular flow reactor
Source: Royal Society of Chemistry journal article supplement (doi:10.1039/d4se01142b), 2024-11-11

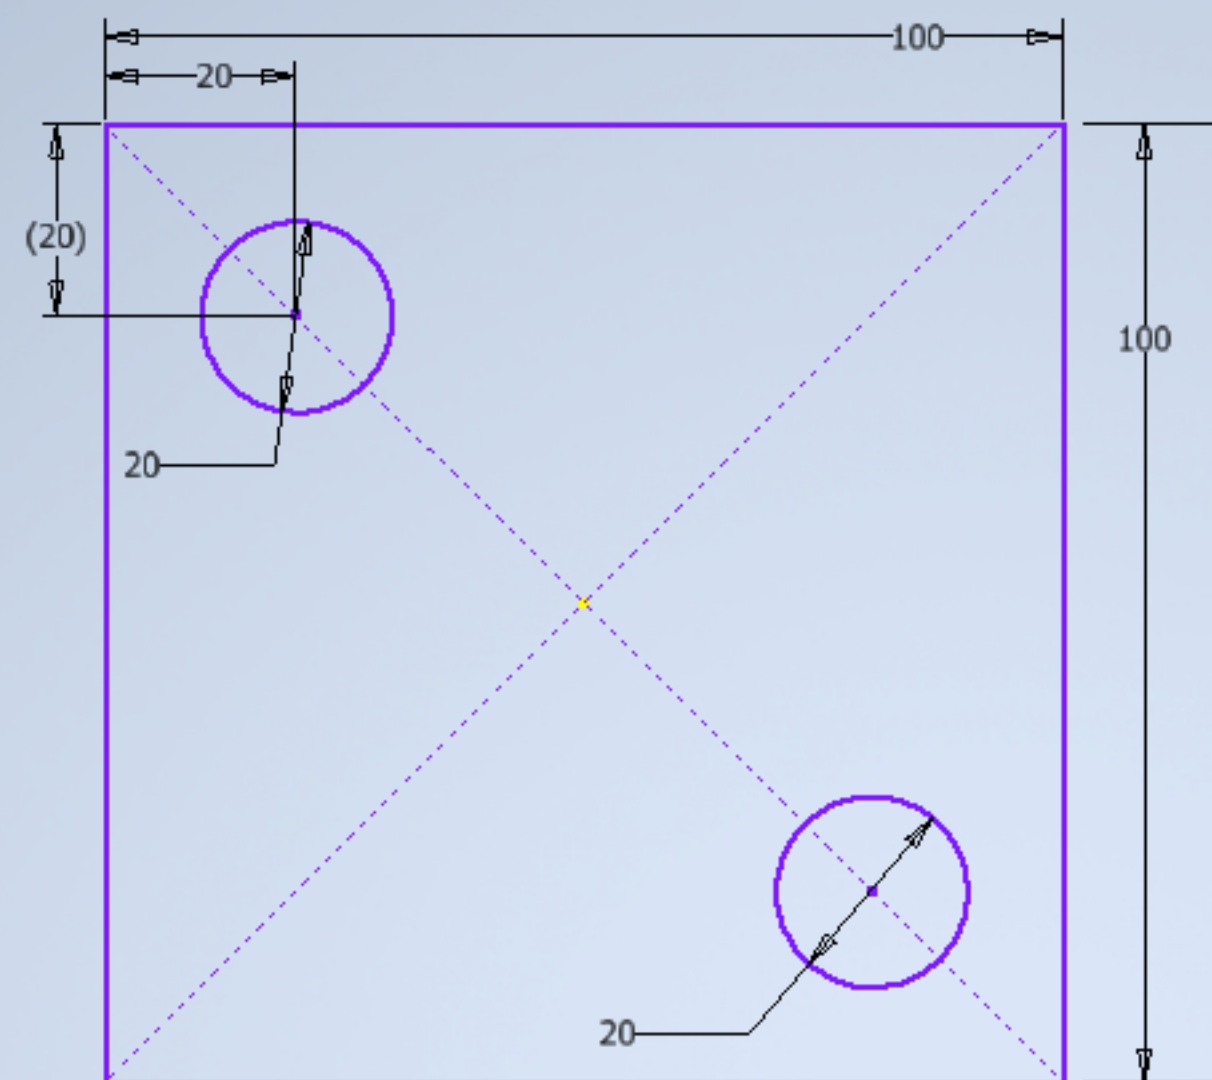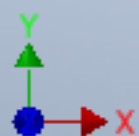

Supplement: d4se01142b2.zip [file glass pfc.pdf › glass pfc.pdf]

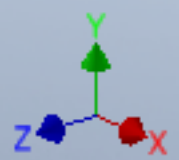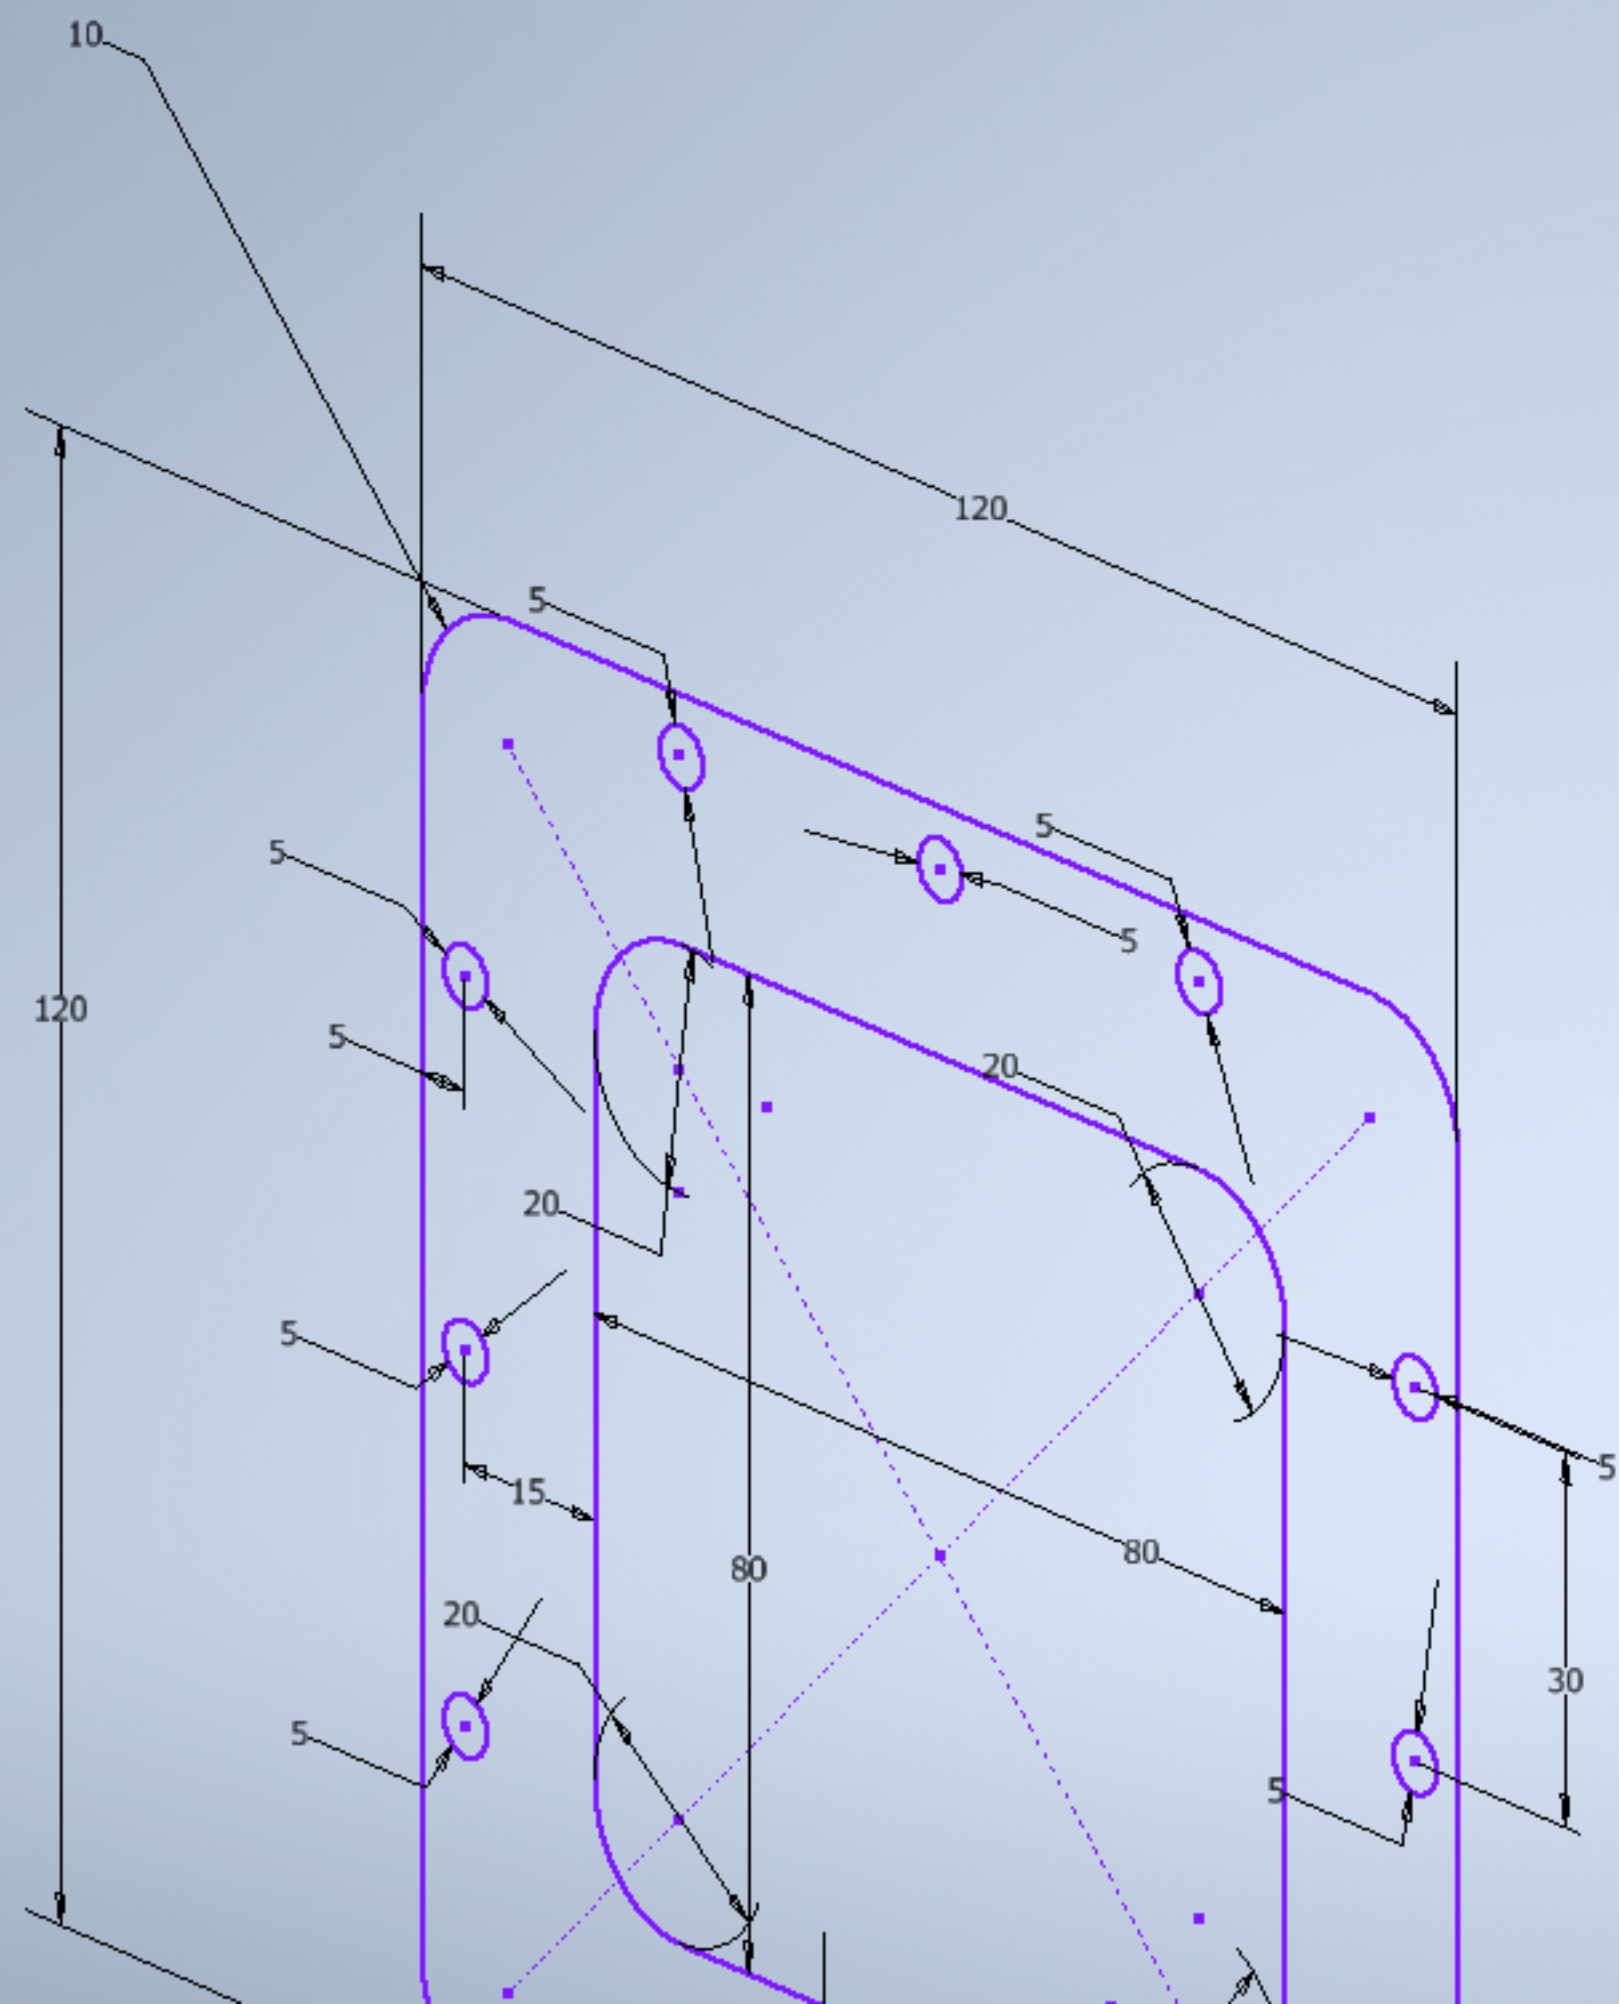

Supplement: d4se01142b2.zip [file steel plate.pdf › steel plate.pdf]
